# Supplementary material for: Combined Effects of Carotenoids and Polyphenols in Balancing the Response of Skin Cells to UV Irradiation
Source: PubMed Central journal article supplement (PMC8036680; doi:10.3390/molecules26071931), 2021-03-30
Supplement: molecules-26-01931-s001.pdf [file molecules-26-01931-s001.pdf]

---

**Table S1.** Individual results of plasma lycopene concentrations. Results are in  $\mu\text{M}$ .

| <b>Treatment</b> |                 | <b>Lycoderm™</b> |               | <b>Washout</b> |               |
|------------------|-----------------|------------------|---------------|----------------|---------------|
| <b>Volunteer</b> | <b>Baseline</b> | <b>Week 2</b>    | <b>Week 3</b> | <b>Week 6</b>  | <b>Week 7</b> |
| 1                | 1.02            | 2.36             | 1.69          | 1.15           | 1.12          |
| 2                | 0.69            | 1.56             | 1.71          | 1.10           | 0.95          |
| 3                | 0.54            | 0.70             | 0.74          | 0.49           | 0.38          |
| 4                | 1.28            | 2.59             | 2.99          | 1.48           | 1.38          |
| 5                | 1.11            | 2.57             | 2.65          | 1.32           | 1.08          |
| 6                | 0.83            | 0.67             | 1.38          | 1.70           | 1.15          |
| 7                | 2.04            | 1.50             | 2.11          | 1.39           | 0.98          |
| 8                | 1.47            | 1.78             | 2.61          | 1.47           | 1.38          |
| 9                | 0.66            | 0.87             | 1.58          |                | 0.81          |
| 10               | 1.31            | 1.38             | 1.48          | 0.98           | 0.76          |
| 11               | 1.77            | 1.16             | 1.84          | 1.42           | 1.09          |
| 12               | 0.98            | 1.72             | 2.15          | 1.55           | 1.19          |
| 13               | 0.57            | 1.19             | 1.00          | 1.18           | 0.70          |
| 14               | 0.68            | 1.12             |               | 0.68           | 0.63          |
| 15               | 1.12            | 1.19             | 2.06          | 1.25           | 0.76          |
| 16               | 0.71            | 1.31             | 1.59          |                | 1.06          |
| 17               | 1.10            | 1.51             | 2.07          | 1.10           | 0.72          |
| 18               | 0.87            | 1.88             | 1.98          | 0.82           | 0.55          |
| 19               | 0.83            | 2.03             | 2.17          | 1.18           | 0.96          |
| 20               | 0.53            | 1.27             | 1.30          | 1.08           | 1.24          |
| 21               | 1.13            | 2.59             | 3.25          | 1.50           | 1.02          |
| 22               | 0.90            | 1.55             | 1.79          | 0.83           | 0.89          |
| 23               | 1.70            | 1.77             | 2.46          | 1.38           | 1.38          |

---

Table S2. Individual results of plasma phytofluene concentrations. Results are in  $\mu\text{M}$ .

| Treatment |          | Lycoderm™ |        | Washout |        |
|-----------|----------|-----------|--------|---------|--------|
| Volunteer | Baseline | Week 2    | Week 3 | Week 6  | Week 7 |
| 1         | 0.21     | 0.59      | 0.61   | 0.33    | 0.31   |
| 2         | 0.15     | 0.46      | 0.55   | 0.36    | 0.26   |
| 3         | 0.15     | 0.23      | 0.30   | 0.17    | 0.15   |
| 4         | 0.26     | 0.52      | 0.70   | 0.34    | 0.39   |
| 5         | 0.34     | 1.11      | 1.28   | 0.59    | 0.39   |
| 6         | 0.29     | 0.25      | 0.34   | 0.50    | 0.34   |
| 7         | 0.43     | 0.39      | 0.66   | 0.35    | 0.27   |
| 8         | 0.23     | 0.25      | 0.40   | 0.19    | 0.19   |
| 9         | 0.20     | 0.36      | 0.65   |         | 0.23   |
| 10        | 0.19     | 0.34      | 0.52   | 0.29    | 0.19   |
| 11        | 0.48     | 0.46      | 0.90   | 0.40    | 0.32   |
| 12        | 0.16     | 0.34      | 0.56   | 0.39    | 0.23   |
| 13        | 0.18     | 0.43      | 0.22   | 0.42    | 0.27   |
| 14        | 0.08     | 0.14      |        | 0.09    | 0.09   |
| 15        | 0.28     | 0.23      | 0.51   | 0.26    | 0.17   |
| 16        | 0.21     | 0.51      | 0.27   |         | 0.45   |
| 17        | 0.19     | 0.33      | 0.62   | 0.23    | 0.18   |
| 18        | 0.22     | 0.29      | 0.50   | 0.30    | 0.21   |
| 19        | 0.14     | 0.30      | 0.32   | 0.21    | 0.18   |
| 20        | 0.18     | 0.46      | 0.46   | 0.24    | 0.29   |
| 21        | 0.20     | 0.77      | 1.00   | 0.34    | 0.20   |
| 22        | 0.10     | 0.30      | 0.41   | 0.13    | 0.20   |
| 23        | 0.74     | 0.57      | 1.37   | 0.39    | 0.44   |

Table S3. Individual results of plasma phytoene concentrations. Results are in  $\mu\text{M}$ .

| Treatment |          | Lycoderm™ |        | Washout |        |
|-----------|----------|-----------|--------|---------|--------|
| Volunteer | Baseline | Week 2    | Week 3 | Week 6  | Week 7 |
| 1         | 0.04     | 0.20      | 0.20   | 0.04    | 0.06   |
| 2         | 0.02     | 0.12      | 0.16   | 0.03    | 0.04   |
| 3         | 0.02     | 0.10      | 0.10   | 0.02    | 0.03   |
| 4         | 0.06     | 0.19      | 0.28   | 0.07    | 0.06   |
| 5         | 0.07     | 0.45      | 0.37   | 0.09    | 0.05   |
| 6         | 0.09     | 0.07      | 0.10   | 0.14    | 0.06   |
| 7         | 0.11     | 0.12      | 0.16   | 0.10    | 0.05   |
| 8         | 0.06     | 0.10      | 0.16   | 0.04    | 0.03   |
| 9         | 0.02     | 0.09      | 0.22   |         | 0.04   |
| 10        | 0.08     | 0.21      | 0.20   | 0.06    | 0.04   |
| 11        | 0.06     | 0.13      | 0.21   | 0.04    | 0.05   |
| 12        | 0.02     | 0.15      | 0.17   | 0.05    | 0.03   |
| 13        | 0.02     | 0.12      | 0.10   | 0.06    | 0.03   |
| 14        | 0.02     | 0.06      |        | 0.01    | 0.02   |
| 15        | 0.06     | 0.09      | 0.21   | 0.05    | 0.02   |
| 16        | 0.06     | 0.21      | 0.19   |         | 0.16   |
| 17        | 0.05     | 0.15      | 0.36   | 0.04    | 0.03   |
| 18        | 0.07     | 0.19      | 0.30   | 0.08    | 0.05   |
| 19        | 0.04     | 0.12      | 0.10   | 0.04    | 0.04   |
| 20        | 0.03     | 0.22      | 0.18   | 0.03    | 0.05   |
| 21        | 0.04     | 0.28      | 0.33   | 0.04    | 0.03   |
| 22        | 0.03     | 0.13      | 0.19   | 0.01    | 0.03   |
| 23        | 0.19     | 0.27      | 0.45   | 0.15    | 0.13   |

**Table S4.** Individual results of plasma  $\beta$ -carotene concentrations. Results are in  $\mu\text{M}$ .

| <b>Treatment</b> |                 | <b>Lycoderm™</b> |               | <b>Washout</b> |               |
|------------------|-----------------|------------------|---------------|----------------|---------------|
| <b>Volunteer</b> | <b>Baseline</b> | <b>Week 2</b>    | <b>Week 3</b> | <b>Week 6</b>  | <b>Week 7</b> |
| 1                | 0.65            | 1.03             | 0.83          | 1.05           | 1.22          |
| 2                | 0.96            | 1.48             | 1.18          | 1.28           | 0.97          |
| 3                | 0.66            | 0.50             | 0.43          | 0.66           | 0.56          |
| 4                | 0.56            | 0.60             | 0.68          | 0.84           | 0.62          |
| 5                | 0.82            | 1.06             | 0.99          | 1.40           | 0.99          |
| 6                | 1.68            | 0.89             | 1.38          | 1.85           | 1.67          |
| 7                | 1.36            | 1.29             | 1.64          | 1.68           | 0.89          |
| 8                | 0.83            | 0.62             | 0.79          | 0.72           | 0.56          |
| 9                | 1.13            | 0.85             | 1.20          |                | 1.12          |
| 10               | 0.72            | 0.70             | 0.79          | 0.59           | 0.50          |
| 11               | 1.70            | 1.32             | 1.87          | 2.11           | 1.55          |
| 12               | 1.08            | 1.04             | 1.45          | 1.83           | 1.25          |
| 13               | 0.50            | 0.57             | 0.52          | 0.61           | 0.47          |
| 14               | 0.37            | 0.44             |               | 0.32           | 0.33          |
| 15               | 0.92            | 0.62             | 1.05          | 1.16           | 0.91          |
| 16               | 0.63            | 0.54             | 0.55          |                | 0.89          |
| 17               | 0.48            | 0.53             | 0.66          | 0.45           | 0.34          |
| 18               | 1.47            | 1.26             | 1.66          | 1.79           | 1.29          |
| 19               | 0.51            | 0.66             | 0.75          | 0.47           | 0.48          |
| 20               | 0.52            | 0.67             | 0.66          | 0.53           | 0.51          |
| 21               | 0.53            | 0.72             | 1.01          | 0.57           | 0.51          |
| 22               | 0.31            | 0.40             | 0.53          | 0.36           | 0.36          |
| 23               | 1.43            | 1.35             | 1.69          | 1.17           | 1.14          |
